# Supplementary material
Source: publisher figshare collection journal article supplement (https://acs.figshare.com/ndownloader/files/5128222)
Supplement: Supplementary file 1 [file 5128222]

## Supporting information

# Fluoroalkylated Polysilane Film as Chemosensor for Explosive Nitroaromatic Compounds

Anubhav Saxena, Michiya Fujiki\*, Roopali Rai, and Giseop Kwak

*Graduate School of Materials Science, Nara Institute of Science and Technology, 8916-5 Takayama, Ikoma, Nara 630-0101 and CREST-JST (Japan Science and Technology Agency), 4-1-8 Hon-cho, Kawaguchi, Saitama 332-0012, Japan.*

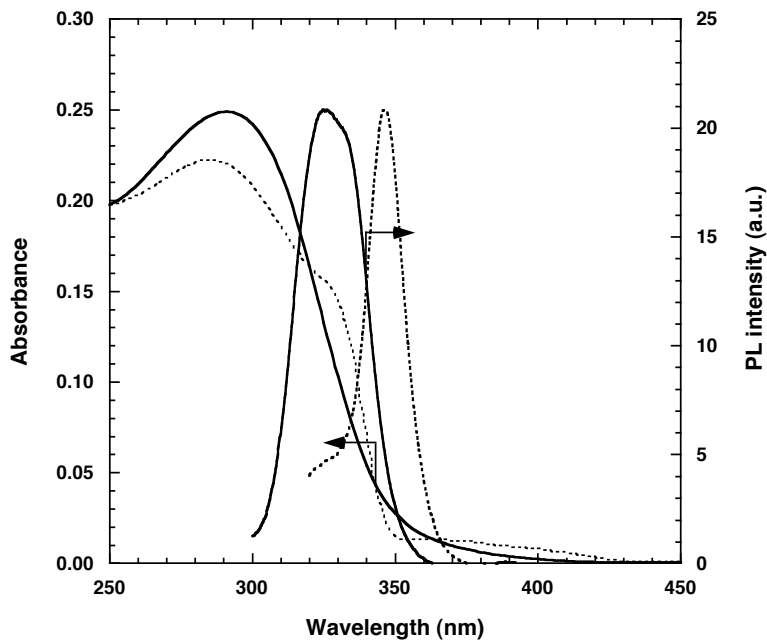

Figure 1. Changes in UV and PL spectra of thin film of **1** before (solid lines) and after washing (dotted lines) with water/MeOH.

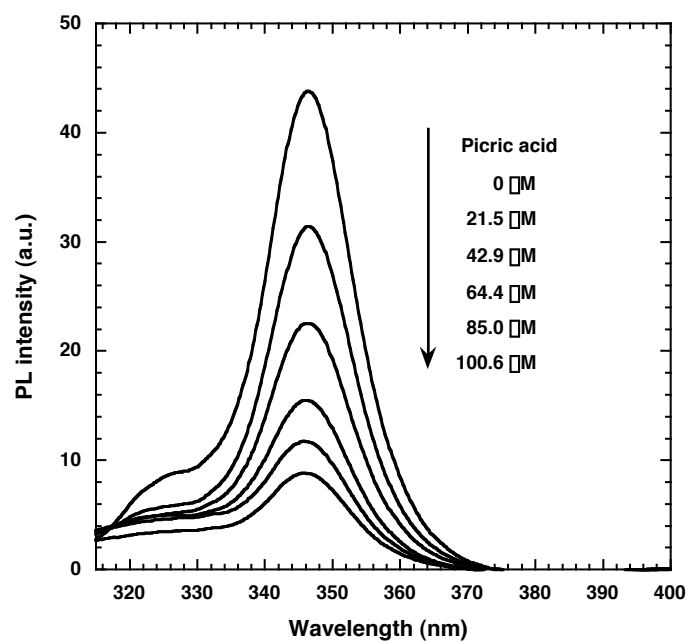

Figure 2. Change in PL spectra (excited at 320 nm) of thin film (after washing; 2<sup>nd</sup> cycle) of **1**, obtained by successive adding aliquots of picric acid in water.

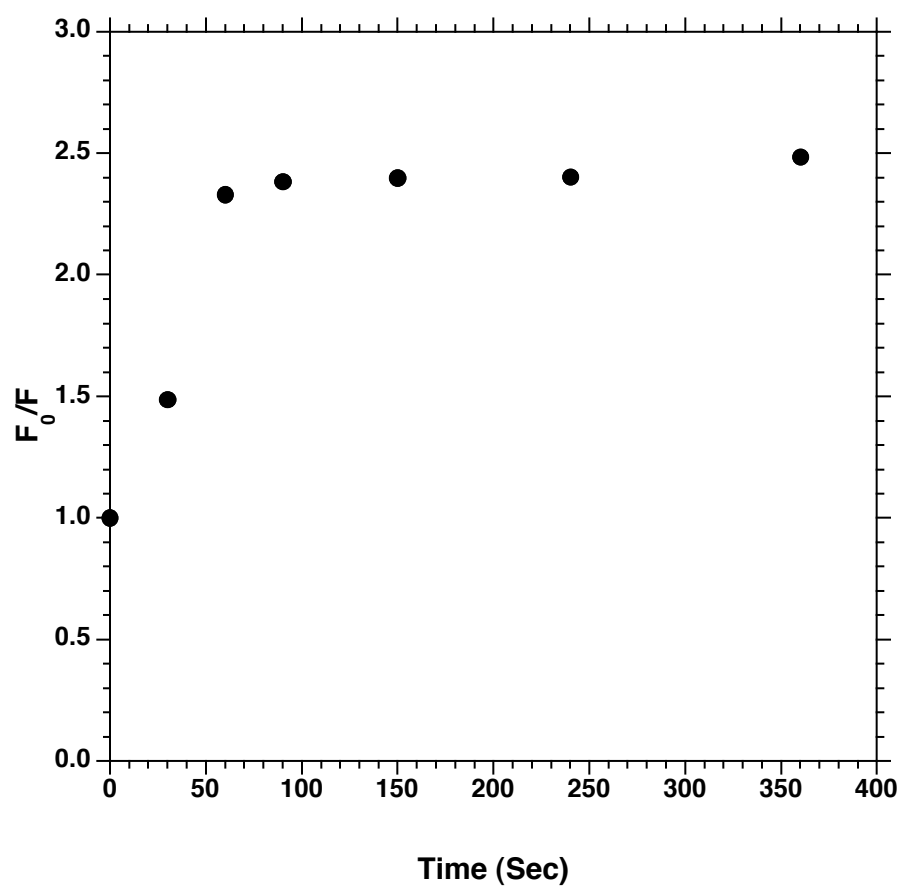

Figure 3. Change in PL intensity of thin film of **1** with time, obtained by adding 50 ppm picric acid in water.
